# Supplementary material
Source: PubMed Central journal article supplement (PMC2834948)

## Supplemental Figure 1

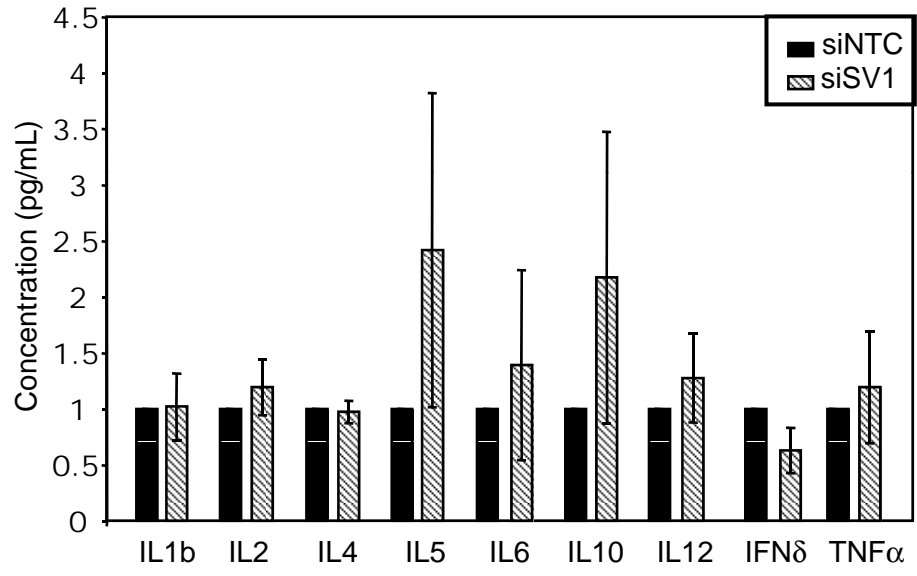

Supplement: NIHMS181564-supplement-sfig1.pdf [file NIHMS181564-supplement-sfig1.pdf]

## Supplemental Figure 2

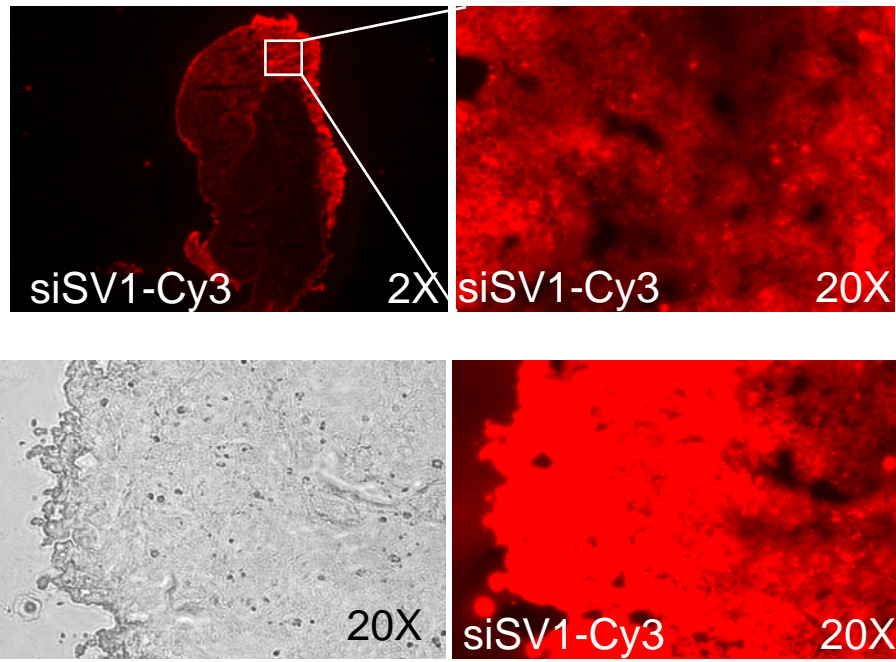

Supplement: NIHMS181564-supplement-sfig2.pdf [file NIHMS181564-supplement-sfig2.pdf]

### Supplementary Figure 3

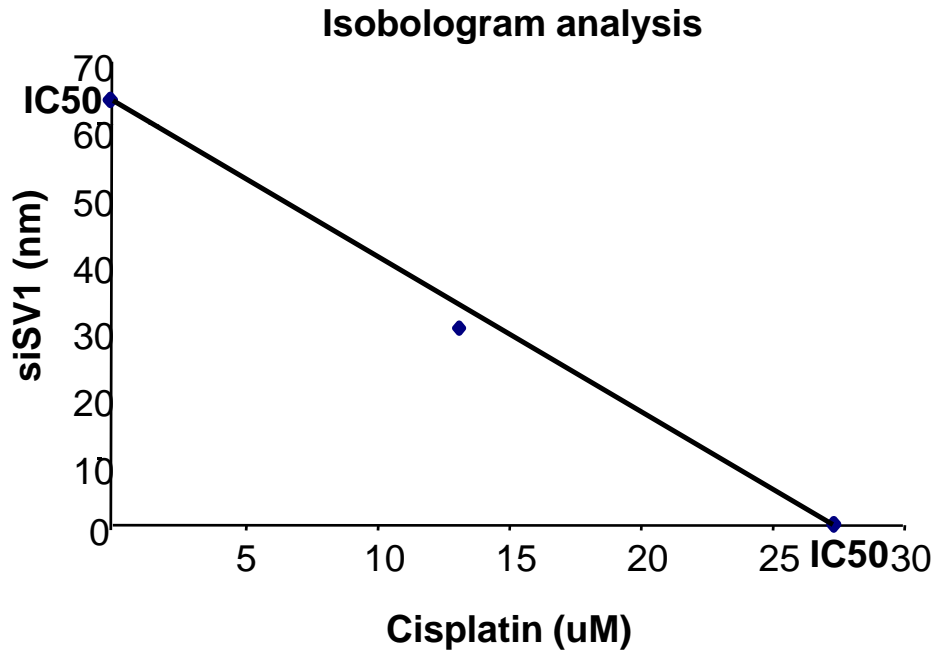

Supplement: NIHMS181564-supplement-sfig3.pdf [file NIHMS181564-supplement-sfig3.pdf]

# Supplemental Figure 4

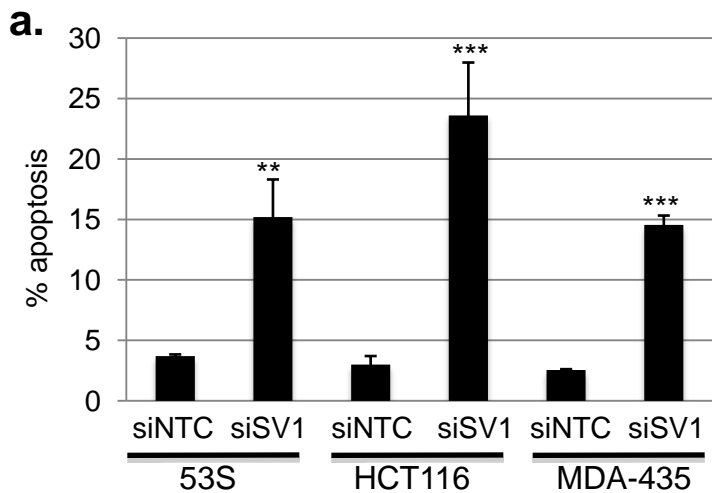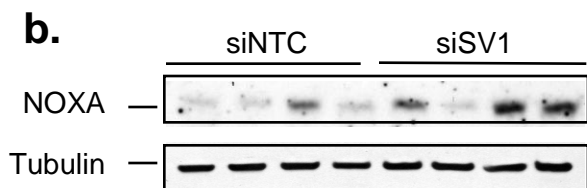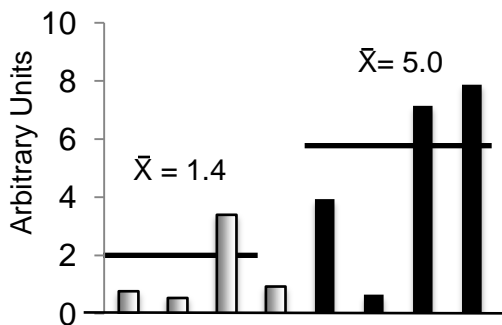

Supplement: NIHMS181564-supplement-sfig4.pdf [file NIHMS181564-supplement-sfig4.pdf]

**Supplemental Figure 5**

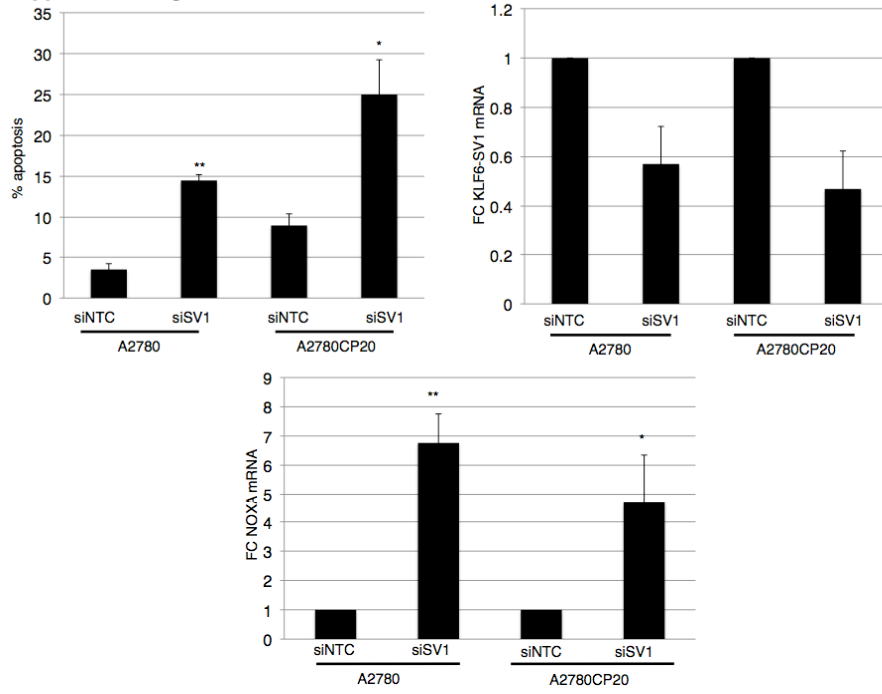

Supplement: NIHMS181564-supplement-sfig5.pdf [file NIHMS181564-supplement-sfig5.pdf]

## Supplemental Figure 6

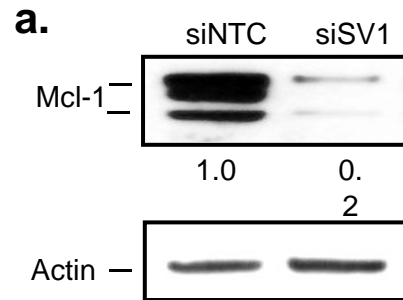

Supplement: NIHMS181564-supplement-sfig6.pdf [file NIHMS181564-supplement-sfig6.pdf]

## Supplemental Figure 7

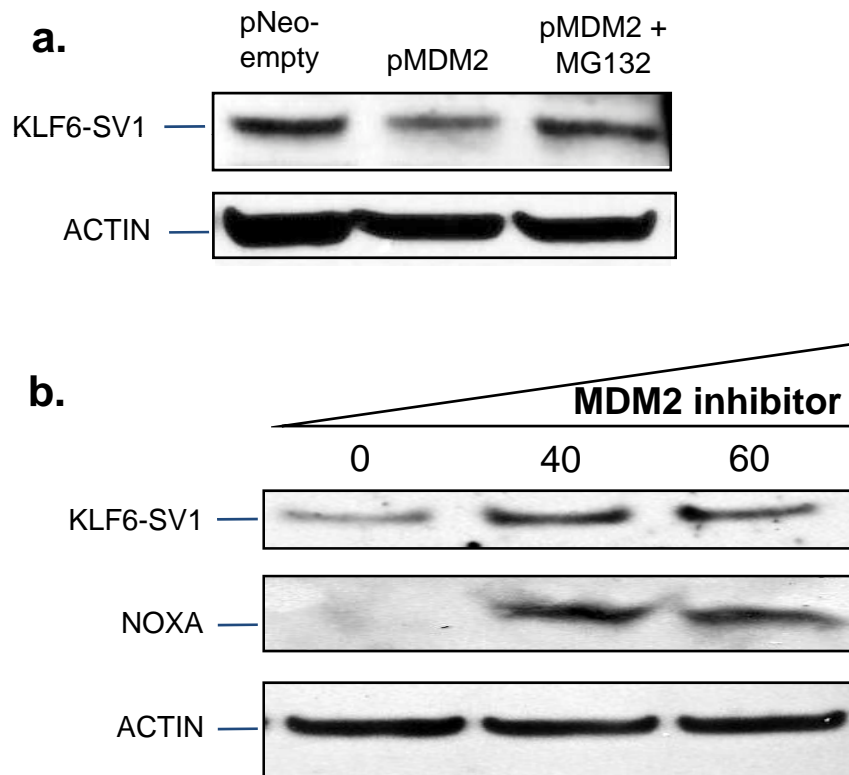

Supplement: NIHMS181564-supplement-sfig7.pdf [file NIHMS181564-supplement-sfig7.pdf]
